# Supplementary material for: Preparation of bacterial cellulose based nitrogen-doped carbon nanofibers and their applications in the oxygen reduction reaction and sodium–ion battery
Source: Royal Society of Chemistry journal article supplement (doi:10.1039/c8nj00708j), 2018-01-01
Supplement: c8nj00708j1.pdf [file c8nj00708j1.pdf]

## Supplementary Information

### Preparation of Bacterial Cellulose Based Nitrogen-doped Carbon Nanofibers and Their Applications in Oxygen Reduction Reaction and Sodium-ion Battery

Yang Huang <sup>a</sup>, Liang Wang <sup>c</sup>, Lei Lu <sup>c</sup>, Mengmeng Fan <sup>a</sup>, Fanshu Yuan <sup>a</sup>, Bianjing Sun <sup>a</sup>, Jieshu Qian <sup>a, b, \*</sup>, Qingli Hao <sup>c, \*</sup>, Dongping Sun <sup>a, \*</sup>

<sup>a</sup> Institute of Chemicobiology and Functional Materials, Nanjing University of Science and Technology, Nanjing 210094, China.

<sup>b</sup> School of Environmental and Biological Engineering, Nanjing University of Science and Technology, Nanjing 210094, China.

<sup>c</sup> Key Laboratory for Soft Chemistry and Functional Materials of Ministry Education, Nanjing University of Science and Technology, Nanjing 210094, China

\* Corresponding authors: Prof. Jieshu Qian

E-mail: qianjieshu@foxmail.com

Tel.: +86-25-84315173

Fax: +86-25-84315352

Add.: Xiao Ling Wei 200, Nanjing, 210094, China

\* Corresponding authors: Prof. Qingli Hao

E-mail: haoqingli@163.com

Tel.: +86-13851864172

Fax: +86-25-84315256

Add.: Xiao Ling Wei 200, Nanjing, 210094, China

\* Corresponding authors: Prof. Dongping Sun

E-mail: sundpe301@163.com

Tel.: +86-25-84315466

Fax: +86-25-84315256

Add.: Xiao Ling Wei 200, Nanjing, 210094, China

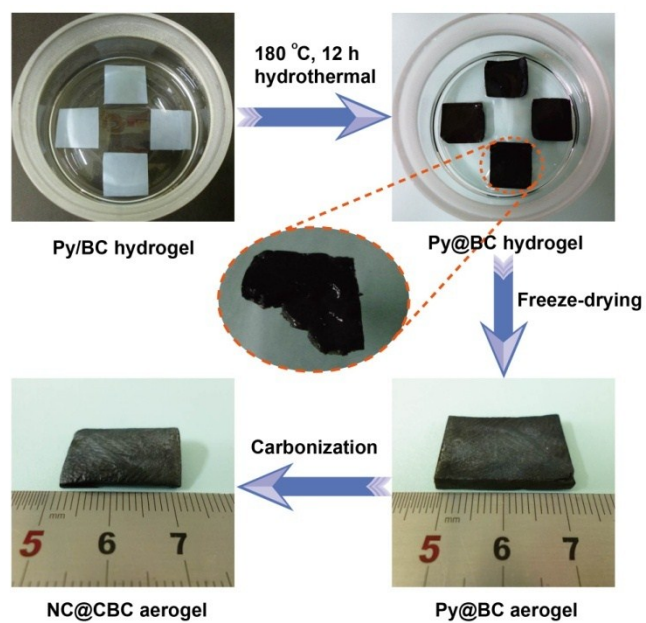

Fig. S1 Optical images showing the sample preparation involved in this work.

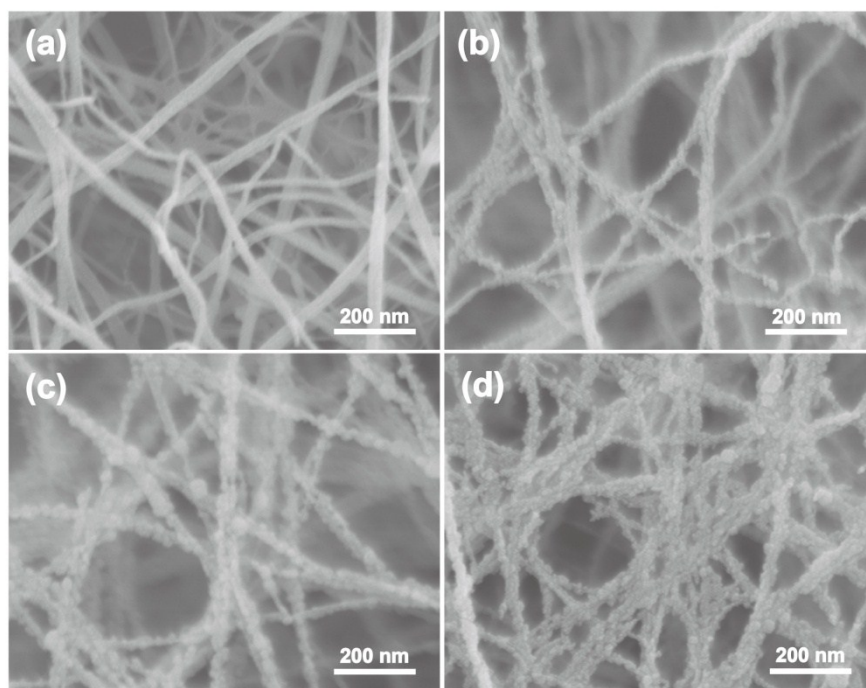

Fig. S2 Representative SEM images of (a) CBC-900, (b) NC@CBC-0.02-900, (c) NC@CBC-0.05-900, and (d) NC@CBC-0.1-900.

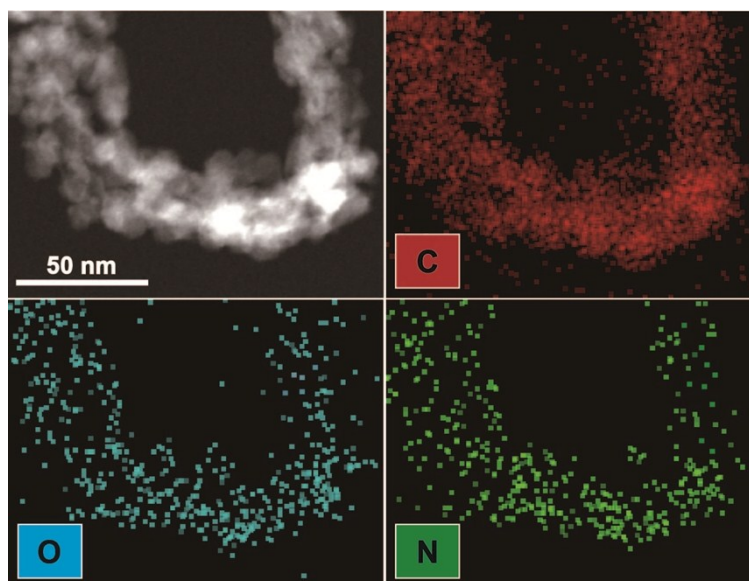

Fig. S3 STEM image of NC@CBC-0.05-900 and the corresponding elemental mapping of C (red), O (blue), and N (green).

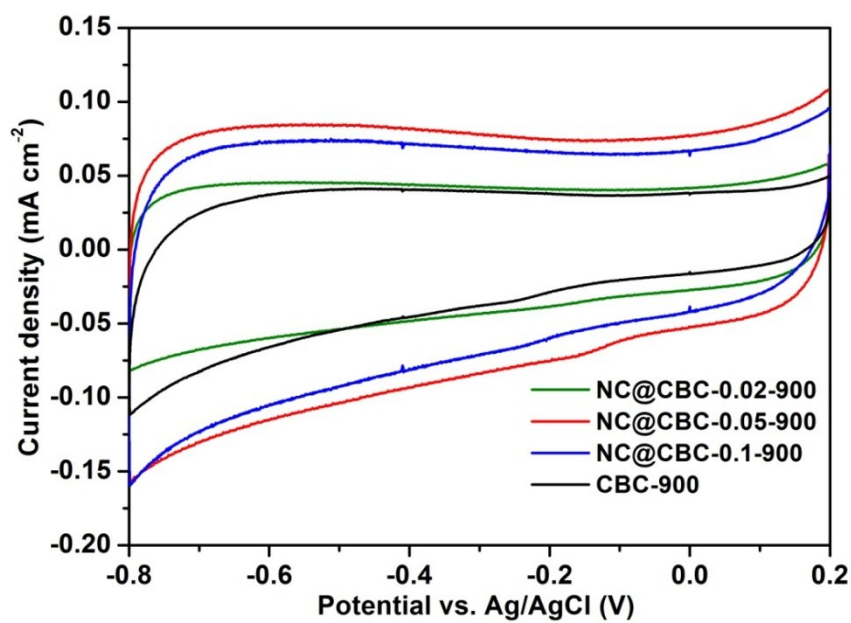

Fig. S4 CV curves of CBC-900 and NC@CBC-X-900 in  $N_2$ -saturated 0.1 M KOH aqueous solution at a scanning rate of  $10 \text{ mV s}^{-1}$ .

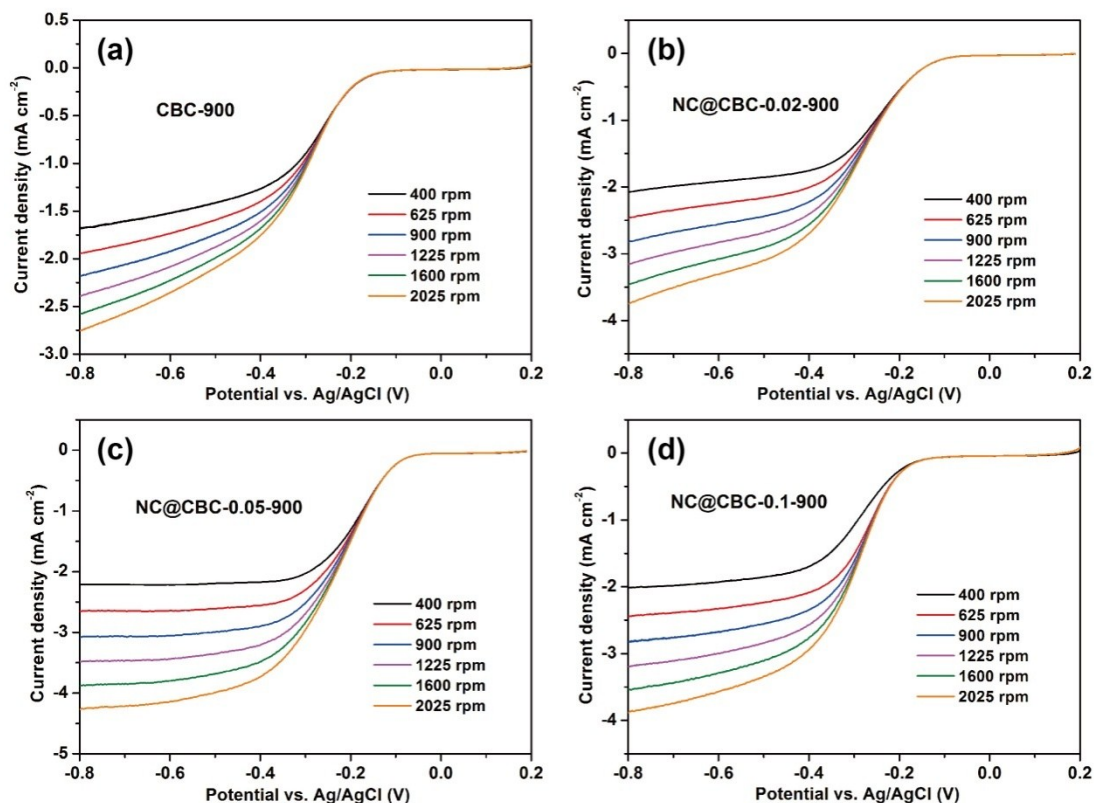

Fig. S5 LSV curves of (a) CBC-900, (b) NC@CBC-0.02-900, (c) NC@CBC-0.05-900, and (d) NC@CBC-0.1-900 in O<sub>2</sub>-saturated 0.1 M KOH aqueous solution obtained under different rotation rates.

Table S1 Onset potential, half-wave potential, diffusion-limiting current density ( $J_L$ ), and kinetic current density ( $J_K$ ) of CBC-900 and NC@CBC-X-900 derived from LSV curves obtained under a consistent rotating rate of 1600 rpm.

| Samples         | Onset potential (V) | Half-wave potential (V) <sup>a</sup> | $J_L$ (mA cm <sup>-2</sup> ) <sup>b</sup> | $J_K$ (mA cm <sup>-2</sup> ) <sup>c</sup> |
|-----------------|---------------------|--------------------------------------|-------------------------------------------|-------------------------------------------|
| CBC-900         | -0.090              | -0.329                               | -2.576                                    | 8.78                                      |
| NC@CBC-0.02-900 | -0.046              | -0.303                               | -3.462                                    | 18.21                                     |
| NC@CBC-0.05-900 | -0.019              | -0.229                               | -3.877                                    | 74.71                                     |
| NC@CBC-0.1-900  | -0.090              | -0.302                               | -3.541                                    | 25.60                                     |

<sup>a</sup> Half-wave potential is calculated at which the current density is a half of the  $J_L$

<sup>b</sup>  $J_L$  is derived from the current density of the LSV (1600 rpm) at -0.8 V

<sup>c</sup>  $J_K$  is calculated from the mass-transport correction of RDE with equation:  $J_K = J \times J_L / (J_L - J)$

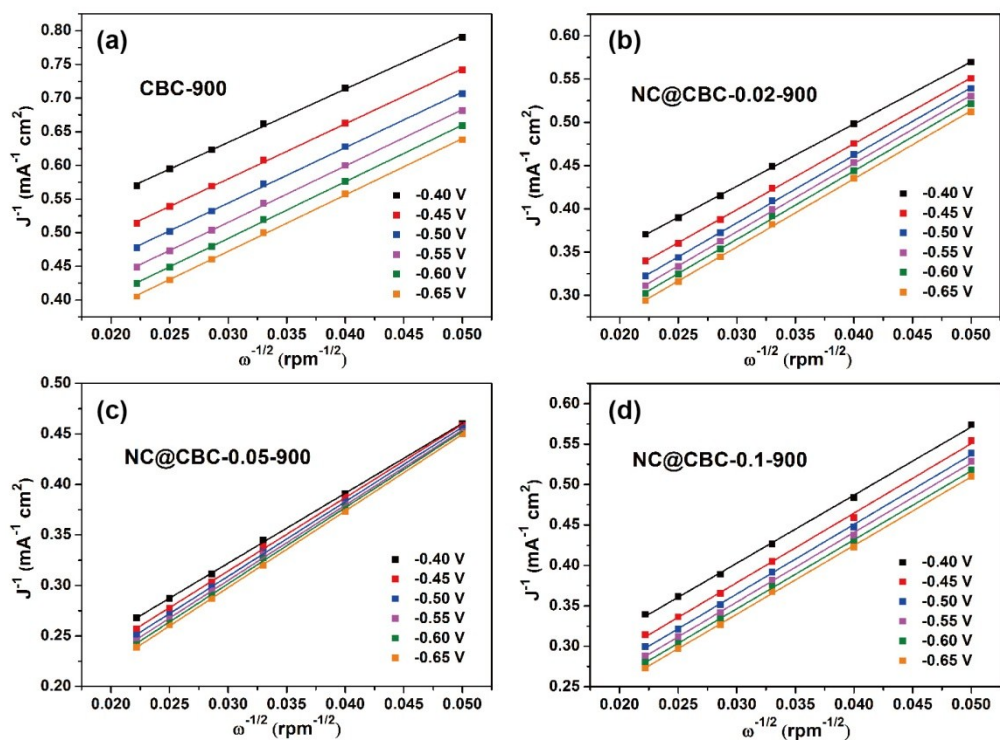

Fig. S6 K-L plots of (a) CBC-900, (b) NC@CBC-0.02-900, (c) NC@CBC-0.05-900, and (d) NC@CBC-0.1-900 at the potentials ranging from -0.65 to -0.40 V (vs. Ag/AgCl).

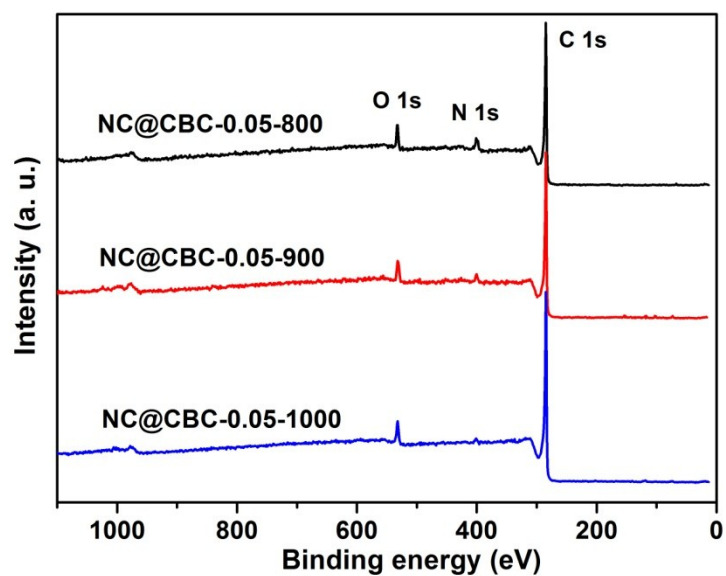

Fig. S7 XPS survey spectra of NC@CBC-0.05-800, NC@CBC-0.05-900, and NC@CBC-0.05-1000.

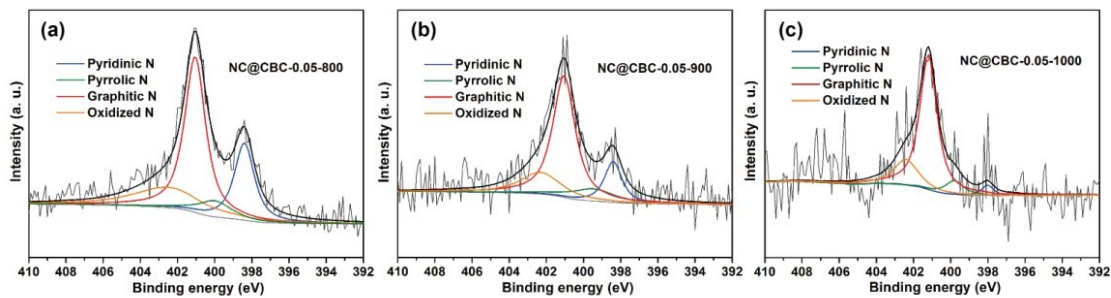

Fig. S8 XPS N1s spectra of (a) NC@CBC-0.05-800, (b) NC@CBC-0.05-900 and (c) NC@CBC-0.05-1000.

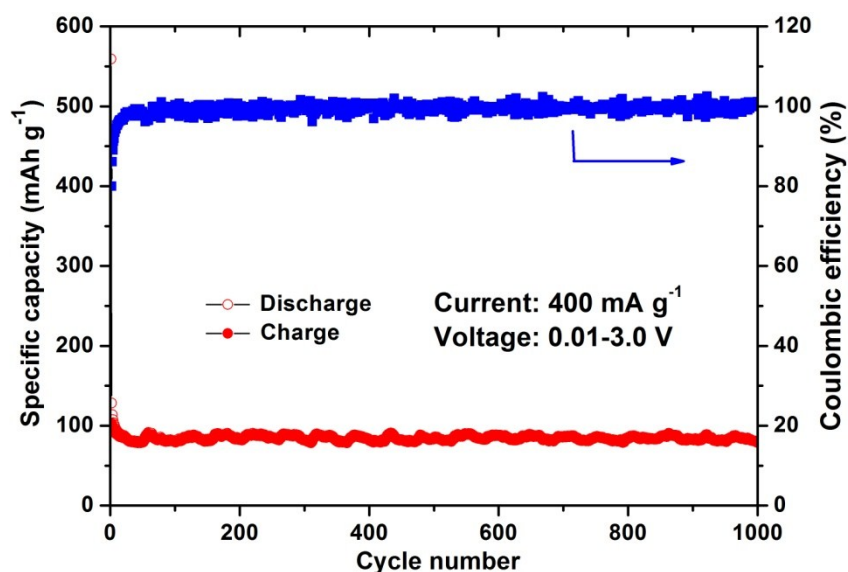

Fig. S9 Long-term cycle performance of CBC-900 as anode in SIBs at a current density of  $400 \text{ mA g}^{-1}$ .

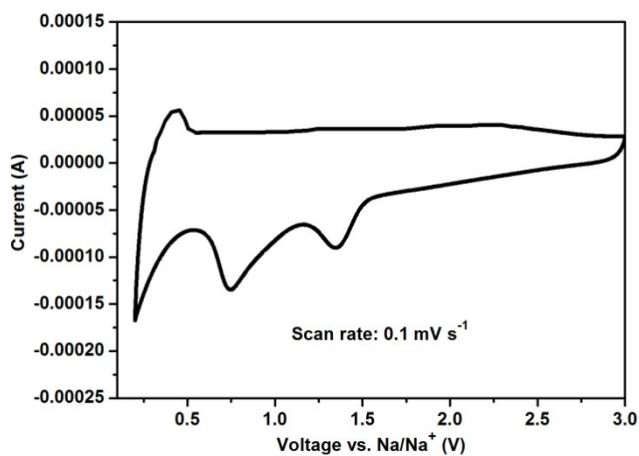

Fig. S10 The first CV cycle of NC@CBC-0.05-900 as anode in SIBs at a scan rate of  $0.1 \text{ mV s}^{-1}$ .

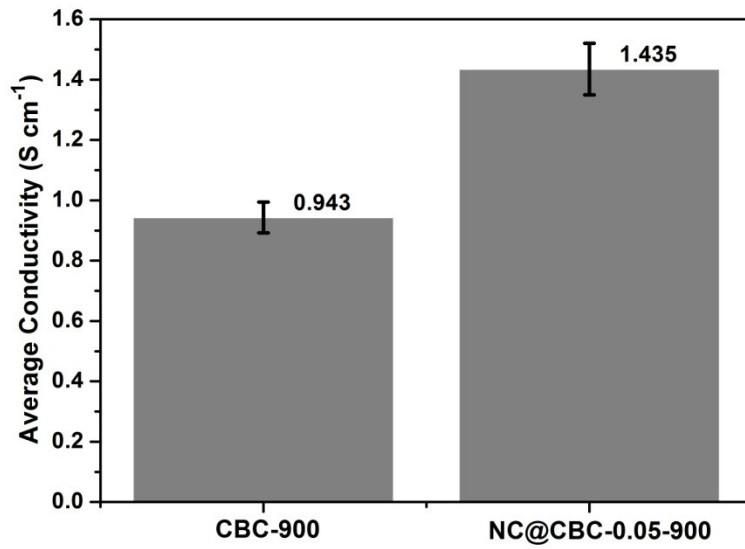

Fig. S11 Comparison of conductivity between CBC-900 and NC@CBC-0.05-900.

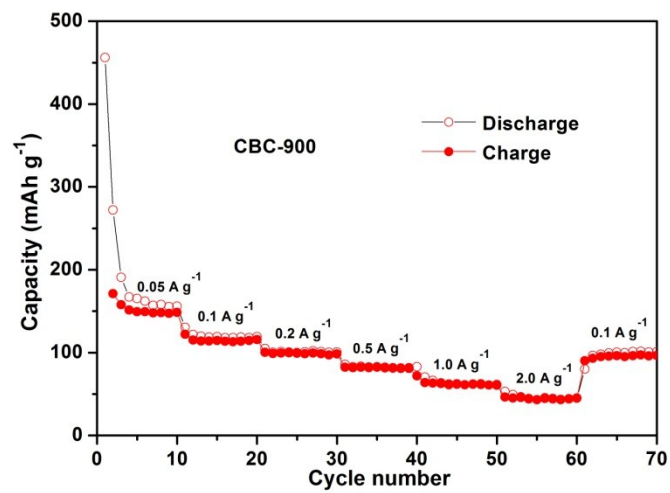

Fig. S12 Rate performance of CBC-900 electrode at various current densities.
